# Supplementary material for: Transcriptome-based identification of antioxidative gene expression after fish oil supplementation in normo- and dyslipidemic men
Source: PubMed Central journal article supplement (PMC3408332; doi:10.1186/1743-7075-9-45), 2012-05-23
Supplement: 1743-7075-9-45-S1.pdf [file 1743-7075-9-45-S1.pdf]

## Additional file 1

### Regulated genes within stress-activated pathways

Genes, which were regulated after four hours ( $t_{4h}$ ), one week ( $t_1$ ) and twelve weeks ( $t_{12}$ ) of fish oil supplementation in normolipidemic and dyslipidemic men were submitted to pathway analyses according to the KEGG database as well as performed with GenMAPP. Expression ratios of regulated genes within mitogen-activated protein kinase (MAPK) signalling pathway, nuclear factor kappa b ( $NF_{\kappa}B$ ) pathway and oxidative stress pathway were displayed.

| Gene name                                                        | Gene symbol | Entrez_ID | RefSeq_ID                                 | Dyslipidemic         |                    |                      | Normolipidemic       |                    |                      |
|------------------------------------------------------------------|-------------|-----------|-------------------------------------------|----------------------|--------------------|----------------------|----------------------|--------------------|----------------------|
|                                                                  |             |           |                                           | Ratio $t_{4h} : t_0$ | Ratio $t_1 : t_0$  | Ratio $t_{12} : t_0$ | Ratio $t_{4h} : t_0$ | Ratio $t_1 : t_0$  | Ratio $t_{12} : t_0$ |
| <b>Mitogen-activated protein kinase (MAPK) signaling pathway</b> |             |           |                                           |                      |                    |                      |                      |                    |                      |
| Arrestin beta-1                                                  | ARRB1       | 408       | NM_004041.3<br>NM_020251.2                | -                    | -                  | 8.60 <sup>1</sup>    | -                    | -                  | -2.12 <sup>2</sup>   |
| Arrestin beta-2                                                  | ARRB2       | 409       | NM_199004.1<br>NM_004313.3                | 2.13 <sup>2</sup>    | 3.86 <sup>3</sup>  | 2.58 <sup>2</sup>    | -                    | -2.37 <sup>2</sup> | -                    |
| V-raf murine sarcoma viral oncogene homolog B1                   | BRAF        | 673       | NM_004333.4                               | -2.16 <sup>1</sup>   | -2.93 <sup>1</sup> | -3.43 <sup>1</sup>   | -                    | -                  | -                    |
| Monocyte differentiation antigen CD14 Precursor                  | CD14        | 929       | NM_000591.2<br>NM_001040021.1             | 4.82 <sup>3</sup>    | -                  | 2.88 <sup>2</sup>    | -                    | -                  | -                    |
| Dual specificity phosphatase Cdc25B                              | CDC25B      | 994       | NM_021873.2<br>NM_021872.2<br>NM_004358.3 | -2.07 <sup>1</sup>   | -2.66 <sup>1</sup> | -                    | -                    | -                  | 2.83 <sup>1</sup>    |
| Cell division cycle 42                                           | CDC42       | 998       | NM_001791.3<br>NM_001039802.1             | -                    | -                  | -                    | -                    | -                  | 14.42 <sup>1</sup>   |
| Dual specificity protein phosphatase 1                           | DUSP1       | 1843      | NM_004417.2                               | -2.071               | -9.67 <sup>1</sup> | -                    | -2.39 <sup>2</sup>   | -2.53 <sup>1</sup> | -                    |
| Dual specificity protein phosphatase 8                           | DUSP8       | 1850      | NM_004420.2                               | -                    | -4.37 <sup>1</sup> | -3.09 <sup>1</sup>   | -                    | -                  | -                    |
| ETS domain-containing protein Elk-4                              | ELK4        | 2005      | NM_021795.2<br>NM_001973.2                | -                    | -                  | 2.38 <sup>2</sup>    | -                    | -                  | -                    |
| Fibroblast growth factor 3                                       | FGF3        | 2248      | NM_005247.2                               | -                    | -4.42 <sup>1</sup> | -16.68 <sup>1</sup>  | -                    | -                  | -                    |
| Fibroblast growth factor receptor 4 Precursor                    | FGFR4       | 2264      | NM_022963.2<br>NM_213647.1<br>NM_002011.3 | -                    | -                  | 2.08 <sup>1</sup>    | -                    | -                  | -                    |
| MAP kinase-interacting serine/threonine-protein kinase 2         | MKNK2       | 2872      | NM_017572.3<br>NM_199054.2                | -                    | -                  | 2.25 <sup>2</sup>    | -                    | -                  | -2.04 <sup>1</sup>   |
| Growth factor receptor-bound protein 2                           | GRB2        | 2885      | NM_203506.2<br>NM_002086.4                | -                    | -2.94 <sup>2</sup> | -                    | -                    | 2.36 <sup>3</sup>  | -                    |
| Heat shock 70 kDa protein 6                                      | HSPA6       | 3310      | NM_002155.3                               | -                    | -                  | -                    | 2.41 <sup>1</sup>    | -                  | -                    |
| Heat shock 70kDa protein 8                                       | HSPA8       | 3312      | NM_153201.1<br>NM_006597.3                | -                    | -3.04 <sup>1</sup> | -                    | -                    | 2.63 <sup>1</sup>  | 4.80 <sup>1</sup>    |
| Heat shock protein beta-1                                        | HSPB1       | 3315      | NM_001540.3                               | -                    | -2.29 <sup>1</sup> | 2.29 <sup>2</sup>    | -                    | -                  | -                    |
| Transcription factor jun-D                                       | JUND        | 3727      | NM_005354.4                               | -                    | 2.14 <sup>1</sup>  | 8.66 <sup>1</sup>    | -                    | -                  | -                    |
| GTPase KRas Precursor                                            | KRAS        | 3845      | NM_033360.2<br>NM_004985.3                | -                    | -2.86 <sup>1</sup> | -3.97 <sup>1</sup>   | -                    | -                  | -                    |

| Gene name                                                                       | Gene symbol | Entrez_ID | RefSeq_ID                                                | Dyslipidemic         |                    |                      | Normolipidemic       |                    |                      |
|---------------------------------------------------------------------------------|-------------|-----------|----------------------------------------------------------|----------------------|--------------------|----------------------|----------------------|--------------------|----------------------|
|                                                                                 |             |           |                                                          | Ratio $t_{4h} : t_0$ | Ratio $t_1 : t_0$  | Ratio $t_{12} : t_0$ | Ratio $t_{4h} : t_0$ | Ratio $t_1 : t_0$  | Ratio $t_{12} : t_0$ |
| <b>Mitogen-activated protein kinase (MAPK) signaling pathway [continuation]</b> |             |           |                                                          |                      |                    |                      |                      |                    |                      |
| Protein max                                                                     | MAX         | 4149      | NM_145113.1<br>NM_145112.1<br>NM_002382.3                | 5.49 <sup>1</sup>    | -                  | 5.05 <sup>1</sup>    | -                    | -2.62 <sup>1</sup> | -                    |
| Mitogen-activated protein kinase kinase 3                                       | MAP3K3      | 4215      | NM_203351.1<br>NM_002401.3                               | -                    | -3.53 <sup>1</sup> | -5.15 <sup>1</sup>   | -                    | -                  | -                    |
| Mitogen-activated protein kinase kinase 5                                       | MAP3K5      | 4217      | NM_005923.3                                              | -                    | -                  | -3.65 <sup>1</sup>   | -                    | -                  | -                    |
| Mitogen-activated protein kinase kinase 11                                      | MAP3K11     | 4296      | NM_002419.3                                              | -                    | 2.71 <sup>1</sup>  | -                    | -                    | -                  | -                    |
| High affinity nerve growth factor receptor Precursor                            | NTRK1       | 4914      | NM_001012331.1<br>NM_002529.3<br>NM_001007792.1          | 4.93 <sup>1</sup>    | -                  | -                    | -                    | -                  | -                    |
| cAMP-dependent protein kinase catalytic subunit alpha                           | PRKACA      | 5566      | NM_207518.1<br>NM_002730.3                               | -                    | -5.55 <sup>1</sup> | -                    | -                    | -                  | -                    |
| Protein kinase C alpha type                                                     | PRKCA       | 5578      | NM_002737.2                                              | -4.94 <sup>1</sup>   | -                  | -2.60 <sup>1</sup>   | -                    | -                  | -                    |
| Protein kinase C beta type                                                      | PRKCB       | 5579      | NM_002738.6                                              | -                    | 12.47 <sup>1</sup> | 23.65 <sup>1</sup>   | -                    | -                  | -                    |
| Mitogen-activated protein kinase 8                                              | MAPK8       | 5599      | NM_139049.1<br>NM_139047.1<br>NM_139046.1<br>NM_002750.2 | -                    | -2.90 <sup>1</sup> | -2.52 <sup>1</sup>   | -                    | -                  | -                    |
| Dual specificity mitogen-activated protein kinase kinase 3                      | MAP2K3      | 5606      | NM_002756.3<br>NM_145109.2                               | -                    | -6.68 <sup>1</sup> | -                    | -2.34 <sup>2</sup>   | -                  | -                    |
| Tyrosine-protein phosphatase non-receptor type 7                                | PTPN7       | 5778      | NM_080588.1<br>NM_002832.2                               | 3.51 <sup>1</sup>    | -                  | -                    | -                    | -                  | -                    |
| Ras-related C3 botulinum toxin substrate 2                                      | RAC2        | 5880      | NM_002872.3                                              | 2.01 <sup>1</sup>    | -                  | -                    | -2.58 <sup>2</sup>   | -2.76 <sup>1</sup> | -                    |
| Mitogen-activated protein kinase kinase kinase 2                                | MAP4K2      | 5871      | NM_004579.2                                              | -                    | -8.82 <sup>1</sup> | -                    | -                    | -                  | 2.78 <sup>1</sup>    |
| Ras GTPase-activating protein 1                                                 | RASA1       | 5921      | NM_002890.1<br>NM_022650.1                               | -                    | 14.46 <sup>1</sup> | 16.67 <sup>1</sup>   | -                    | -                  | -                    |
| Ribosomal protein S6 kinase alpha-1                                             | RPS6KA1     | 6195      | NM_002953.3<br>NM_001006665.1                            | -                    | -5.52 <sup>1</sup> | 2.99 <sup>2</sup>    | -                    | -                  | 2.32 <sup>3</sup>    |
| Dual specificity mitogen-activated protein kinase kinase 4                      | MAP2K4      | 6416      | NM_003010.2                                              | -2.35 <sup>1</sup>   | -                  | -2.72 <sup>1</sup>   | -                    | -                  | -                    |
| TGF-beta receptor type-2 Precursor                                              | TGFBR2      | 7048      | NM_003242.5<br>NM_001024847.2                            | 8.64 <sup>1</sup>    | -                  | 5.95 <sup>1</sup>    | -3.10 <sup>1</sup>   | -2.36 <sup>1</sup> | -                    |
| Interleukin-1 receptor type II                                                  | IL1R2       | 7850      | NM_173343.1<br>NM_004633.3                               | -                    | -5.50 <sup>1</sup> | -                    | -                    | -                  | -                    |

| Gene name                                                                       | Gene symbol | Entrez_ID | RefSeq_ID                                                                                             | Dyslipidemic         |                     |                      | Normolipidemic       |                    |                      |
|---------------------------------------------------------------------------------|-------------|-----------|-------------------------------------------------------------------------------------------------------|----------------------|---------------------|----------------------|----------------------|--------------------|----------------------|
|                                                                                 |             |           |                                                                                                       | Ratio $t_{4h} : t_0$ | Ratio $t_1 : t_0$   | Ratio $t_{12} : t_0$ | Ratio $t_{4h} : t_0$ | Ratio $t_1 : t_0$  | Ratio $t_{12} : t_0$ |
| <b>Mitogen-activated protein kinase (MAPK) signaling pathway [continuation]</b> |             |           |                                                                                                       |                      |                     |                      |                      |                    |                      |
| MAP kinase-activated protein kinase 5                                           | MAPKAPK5    | 8550      | NM_139078.1<br>NM_003668.2                                                                            | -                    | -9.40 <sup>1</sup>  | -6.52 <sup>1</sup>   | -                    | -                  | -                    |
| Tumor necrosis factor receptor superfamily member 1A                            | TNFRSF1A    | 7132      | NM_001065.2                                                                                           | -                    | -10.73 <sup>1</sup> | -                    | -2.74 <sup>2</sup>   | -3.62 <sup>1</sup> | -                    |
| Ribosomal protein S6 kinase alpha-4                                             | RPS6KA4     | 8986      | NM_003942.2<br>NM_001006944.1                                                                         | -4.00 <sup>1</sup>   | -4.65 <sup>1</sup>  | -3.42 <sup>1</sup>   | -                    | -                  | -                    |
| Mitogen-activated protein kinase kinase 6                                       | MAP3K6      | 9064      | NM_004672.3                                                                                           | -                    | -                   | -                    | -                    | -                  | 2.34 <sup>1</sup>    |
| Serine/threonine-protein kinase TAO2                                            | TAOK2       | 9344      | NM_016151.2                                                                                           | -                    | -                   | 3.04 <sup>1</sup>    | -                    | 2.16 <sup>1</sup>  | -                    |
| Mitogen-activated protein kinase kinase kinase 4                                | MAP4K4      | 9448      | NM_145687.2<br>NM_004834.3<br>NM_145686.2                                                             | -                    | -                   | -6.73 <sup>2</sup>   | -                    | -                  | -                    |
| Rap guanine nucleotide exchange factor 2                                        | RAPGEF2     | 9693      | NM_014247.2                                                                                           | -                    | -2.73 <sup>1</sup>  | -                    | -                    | -                  | -                    |
| Mitogen-activated protein kinase kinase kinase 7-interacting protein 1          | TAB1        | 10454     | NM_006116.2                                                                                           | 4.41 <sup>1</sup>    | 16.23 <sup>1</sup>  | 6.79 <sup>1</sup>    | -                    | -                  | -                    |
| Calcium-binding protein p22                                                     | CHP         | 11261     | NM_007236.4                                                                                           | 5.03 <sup>3</sup>    | -                   | -2.58 <sup>1</sup>   | -                    | -                  | -                    |
| Mitogen-activated protein kinase kinase kinase 7-interacting protein 2          | TAB2        | 23118     | NM_015093.3                                                                                           | -                    | -3.91 <sup>1</sup>  | -9.24 <sup>1</sup>   | -                    | -                  | -                    |
| Voltage-dependent calcium channel gamma-5 subunit                               | CACNG5      | 27091     | NM_014404.1                                                                                           | -                    | -5.04 <sup>1</sup>  | -9.92 <sup>1</sup>   | -                    | -                  | -                    |
| Group IIE secretory phospholipase A2                                            | PLA2G2E     | 30814     | NM_014589.1                                                                                           | -                    | -                   | 2.51 <sup>1</sup>    | -2.01 <sup>1</sup>   | -                  | -                    |
| Voltage-dependent calcium channel gamma-6 subunit                               | CACNG6      | 59285     | NM_031897.2<br>NM_145815.1<br>NM_145814.1                                                             | -                    | -                   | -                    | -                    | 2.92 <sup>1</sup>  | 5.89 <sup>1</sup>    |
| Calcineurin B homologous protein 2                                              | CHP2        | 63928     | NM_022097.2                                                                                           | -                    | -5.75 <sup>1</sup>  | -5.31 <sup>1</sup>   | -                    | -                  | -                    |
| Protein kinase C eta type                                                       | PRKCH       | 5583      | NM_006255.3                                                                                           | -                    | -2.91 <sup>1</sup>  | -2.36 <sup>1</sup>   | -                    | -                  | -                    |
| Mitogen-activated protein kinase 4                                              | MAPK4       | 5596      | NM_002747.3                                                                                           | -                    | -13.56 <sup>1</sup> | -2.92 <sup>1</sup>   | -                    | -                  | -                    |
| Member of RAS oncogene family                                                   | RAP1B       | 5908      | NM_001010942.2<br>NM_001251917.1<br>NM_001251918.1<br>NM_001251921.1<br>NM_001251922.1<br>NM_015646.5 | -                    | 4.15 <sup>1</sup>   | 2.05 <sup>1</sup>    | -                    | -                  | -                    |

| Gene name                                                                       | Gene symbol | Entrez_ID | RefSeq_ID                                                         | Dyslipidemic         |                     |                      | Normolipidemic       |                    |                      |
|---------------------------------------------------------------------------------|-------------|-----------|-------------------------------------------------------------------|----------------------|---------------------|----------------------|----------------------|--------------------|----------------------|
|                                                                                 |             |           |                                                                   | Ratio $t_{4h} : t_0$ | Ratio $t_1 : t_0$   | Ratio $t_{12} : t_0$ | Ratio $t_{4h} : t_0$ | Ratio $t_1 : t_0$  | Ratio $t_{12} : t_0$ |
| <b>Mitogen-activated protein kinase (MAPK) signaling pathway [continuation]</b> |             |           |                                                                   |                      |                     |                      |                      |                    |                      |
| Dual specificity mitogen-activated protein kinase kinase 6                      | MAP2K6      | 5608      | NM_002758.3                                                       | -                    | -3.25 <sup>1</sup>  | -2.89 <sup>1</sup>   | -                    | -                  | -                    |
| Protein kinase C zeta type                                                      | PRKCZ       | 5590      | NM_001033581.1<br>NM_001033582.1<br>NM_001242874.1<br>NM_002744.4 | -2.65 <sup>1</sup>   | -                   | -                    | -                    | -                  | -                    |
| Caspase-9                                                                       | CASP9       | 842       | NM_032996.1<br>NM_001229.2                                        | 3.69 <sup>1</sup>    | -                   | -                    | -                    | -                  | -                    |
| Caspase-1                                                                       | CASP1       | 834       | NM_033293.2<br>NM_033292.2<br>NM_001223.3                         | 2.12 <sup>1</sup>    | -                   | -                    | -                    | -                  | -                    |
| ECSIT homolog (Drosophila)                                                      | ECSIT       | 51295     | NM_001142464.2<br>NM_001142465.2<br>NM_001243204.1<br>NM_016581.4 | -                    | 8.23 <sup>1</sup>   | 8.72 <sup>1</sup>    | -                    | -                  | -                    |
| Receptor-interacting serine/threonine-protein kinase 1                          | RIPK1       | 8737      | NM_003804.3                                                       | -                    | 3.45 <sup>1</sup>   | 2.20 <sup>2</sup>    | -                    | -                  | -                    |
| <b>Nuclear factor kappa b pathway</b>                                           |             |           |                                                                   |                      |                     |                      |                      |                    |                      |
| Alkaline phosphatase, tissue-nonspecific isozyme                                | ALPL        | 249       | NM_000478.4<br>NM_001127501.2<br>NM_001177520.1                   | -                    | -3.47 <sup>1</sup>  | 2.03 <sup>2</sup>    | -                    | 2.42 <sup>1</sup>  | 2.81 <sup>1</sup>    |
| Tumor necrosis factor receptor superfamily member 8                             | TNFRSF8     | 943       | NM_152942.2<br>NM_001243.3                                        | 7.79 <sup>1</sup>    | -                   | -                    | -                    | -                  | -                    |
| Tumor necrosis factor receptor superfamily member 1A                            | TNFRSF1A    | 7132      | NM_001065.2                                                       | -                    | -10.73 <sup>1</sup> | -                    | -2.74 <sup>2</sup>   | -3.62 <sup>1</sup> | -                    |
| Protein kinase C zeta type                                                      | PRKCZ       | 5590      | NM_001033581.1<br>NM_001033582.1<br>NM_001242874.1<br>NM_002744.4 | -2.65 <sup>1</sup>   | -                   | -                    | -                    | -                  | -                    |
| cAMP-dependent protein kinase catalytic subunit alpha                           | PRKACA      | 5566      | NM_207518.1<br>NM_002730.3                                        | -                    | -5.55 <sup>1</sup>  | -                    | -                    | -                  | -                    |
| Tumor necrosis factor receptor superfamily member 1B                            | TNFRSF1B    | 7133      | NM_001066.2                                                       | -                    | -                   | 2.51 <sup>2</sup>    | -2.66 <sup>2</sup>   | -                  | -                    |
| Receptor-interacting serine/threonine-protein kinase 1                          | RIPK1       | 8737      | NM_003804.3                                                       | -                    | 3.45 <sup>1</sup>   | 2.20 <sup>2</sup>    | -                    | -                  | -                    |
| Kinectin                                                                        | KTN1        | 3895      | NM_182926.2                                                       | -5.37 <sup>1</sup>   | -                   | -                    | -                    | -                  | -                    |

| Gene name                                                              | Gene symbol | Entrez_ID | RefSeq_ID                                    | Dyslipidemic         |                     |                      | Normolipidemic       |                    |                      |
|------------------------------------------------------------------------|-------------|-----------|----------------------------------------------|----------------------|---------------------|----------------------|----------------------|--------------------|----------------------|
|                                                                        |             |           |                                              | Ratio $t_{4h} : t_0$ | Ratio $t_1 : t_0$   | Ratio $t_{12} : t_0$ | Ratio $t_{4h} : t_0$ | Ratio $t_1 : t_0$  | Ratio $t_{12} : t_0$ |
| <b>Nuclear factor kappa b pathway [continuation]</b>                   |             |           |                                              |                      |                     |                      |                      |                    |                      |
| DNA replication licensing factor MCM5                                  | MCM5        | 4174      | NM_006739.3                                  | -4.07 <sup>1</sup>   | -                   | -                    | -                    | -                  | -                    |
| Guanine nucleotide-binding protein subunit beta-2-like 1               | GNB2L1      | 10399     | NM_006098.4                                  | 9.05 <sup>3</sup>    | 6.06 <sup>3</sup>   | 14.73 <sup>3</sup>   | -                    | -2.76 <sup>2</sup> | -                    |
| BAG family molecular chaperone regulator 4                             | BAG4        | 9530      | NM_004874.2                                  | -                    | 6.19 <sup>1</sup>   | 4.97 <sup>1</sup>    | -                    | -                  | -                    |
| Ribosomal protein L4                                                   | RPL4        | 6124      | NM_000968.2                                  | -                    | -3.85 <sup>1</sup>  | 2.91 <sup>2</sup>    | -                    | -2.59 <sup>2</sup> | -                    |
| Ribosomal protein S11                                                  | RPS11       | 6205      | NM_001015.3                                  | -                    | -4.94 <sup>2</sup>  | 2.10 <sup>2</sup>    | -                    | -                  | 2.20 <sup>3</sup>    |
| Ribosomal protein L30                                                  | RPL30       | 6156      | NM_000989.2                                  | -                    | -                   | 3.34 <sup>1</sup>    | -                    | -                  | 2.73 <sup>2</sup>    |
| Mitogen-activated protein kinase kinase 3                              | MAP3K3      | 4215      | NM_203351.1<br>NM_002401.3                   | -                    | -3.53 <sup>1</sup>  | -5.15 <sup>1</sup>   | -                    | -                  | -                    |
| Ras GTPase-activating protein-binding protein 2                        | G3BP2       | 9908      | NM_012297.4<br>NM_203505.2<br>NM_203504.2    | -2.93 <sup>1</sup>   | -3.23 <sup>1</sup>  | -5.21 <sup>1</sup>   | -                    | -                  | -                    |
| 14-3-3 protein eta                                                     | YWHAH       | 7533      | NM_003405.3                                  | -                    | -9.33 <sup>1</sup>  | -                    | -                    | -                  | -                    |
| Heat shock protein beta-1                                              | HSPB1       | 3315      | NM_001540.3                                  | -                    | -2.29 <sup>1</sup>  | 2.29 <sup>2</sup>    | -                    | -                  | -                    |
| Mitogen-activated protein kinase kinase kinase 7-interacting protein 1 | MAP3K7IP1   | 10454     | NM_006116.2                                  | 4.41 <sup>1</sup>    | 16.23 <sup>1</sup>  | 6.79 <sup>1</sup>    | -                    | -                  | -                    |
| Mitogen-activated protein kinase kinase kinase 7-interacting protein 1 | MAP3K71P2   | 23118     | NM_015093.3                                  | -                    | -3.91 <sup>1</sup>  | -9.24 <sup>1</sup>   | -                    | -                  | -                    |
| Casein kinase 2, beta polypeptide                                      | CSNK2B      | 1460      | NM_001320.5                                  | -                    | -                   | 2.81 <sup>2</sup>    | -2.11 <sup>2</sup>   | -                  | -                    |
| 14-3-3 protein gamma                                                   | YWHAG       | 7532      | NM_012479.3                                  | -                    | -3.29 <sup>1</sup>  | -2.41 <sup>1</sup>   | -                    | -                  | -                    |
| Histone deacetylase 6                                                  | HDAC6       | 10013     | NM_006044.2                                  | -                    | 5.46 <sup>3</sup>   | 6.89 <sup>3</sup>    | -                    | -                  | -                    |
| SWI/SNF complex subunit SMARCC2                                        | SMARCC2     | 6601      | NM_001130420.1<br>NM_003075.3<br>NM_139067.2 | -                    | -7.44 <sup>1</sup>  | -2.60 <sup>2</sup>   | -                    | -                  | 2.54 <sup>1</sup>    |
| DNA-directed RNA polymerases I and III subunit RPAC1                   | POLR1C      | 9533      | NM_004875.2<br>NM_203290.1                   | -                    | -14.84 <sup>1</sup> | -5.72 <sup>1</sup>   | -                    | -                  | -                    |
| 5-azacytidine-induced protein 2                                        | AZI2        | 64343     | NM_022461.3                                  | -                    | -2.15 <sup>1</sup>  | -5.29 <sup>1</sup>   | -                    | -                  | -                    |
| Mitogen-activated protein kinase kinase kinase 7-interacting protein 2 | TXLNA       | 200081    | NM_175852.3                                  | -                    | 5.06 <sup>1</sup>   | 3.45 <sup>1</sup>    | -                    | -                  | -                    |

| Gene name                                  | Gene symbol | Entrez_ID | RefSeq_ID                                       | Dyslipidemic         |                    |                      | Normolipidemic       |                   |                      |
|--------------------------------------------|-------------|-----------|-------------------------------------------------|----------------------|--------------------|----------------------|----------------------|-------------------|----------------------|
|                                            |             |           |                                                 | Ratio $t_{4h} : t_0$ | Ratio $t_1 : t_0$  | Ratio $t_{12} : t_0$ | Ratio $t_{4h} : t_0$ | Ratio $t_1 : t_0$ | Ratio $t_{12} : t_0$ |
| <b>oxidative stress pathway</b>            |             |           |                                                 |                      |                    |                      |                      |                   |                      |
| Glutathione peroxidase 1                   | GPX1        | 2876      | NM_000581.2<br>NM_201397.1                      | -                    | -                  | -                    | -                    | -                 | -2.48 <sup>3</sup>   |
| Extracellular superoxide dismutase [Cu-Zn] | SOD3        | 6649      | NM_003102.2                                     | -                    | -                  | 4.07 <sup>3</sup>    | -                    | -                 | 2.91 <sup>3</sup>    |
| Nuclear factor 1 X-type                    | NFIX        | 4784      | NM_002501.2                                     | -                    | -3.50 <sup>1</sup> | 3.04 <sup>2</sup>    | -2.57 <sup>1</sup>   | -                 | -                    |
| Superoxide dismutase 2, mitochondrial      | SOD2        | 6648      | NM_000636.2                                     | -                    | -                  | -                    | 2.68 <sup>1</sup>    | -                 | -                    |
| Glutathione reductase                      | GSR         | 2936      | NM_000637.2                                     | -                    | -                  | 2.38 <sup>3</sup>    | -                    | -                 | -2.54 <sup>2</sup>   |
| Transcription factor Sp1                   | SP1         | 6667      | NM_001251825.1<br>NM_003109.1<br>NM_138473.2    | 3.91 <sup>1</sup>    | -                  | -                    | -                    | -                 | -                    |
| Cytochrome b-245 light chain               | CYBA        | 1535      | NM_000101.2                                     | -                    | -3.77 <sup>1</sup> | 2.61 <sup>2</sup>    | -                    | -                 | -                    |
| Heme oxygenase 1                           | HMOX1       | 3162      | NM_002133.1                                     | -                    | -8.57 <sup>1</sup> | -17.52 <sup>1</sup>  | -                    | -                 | -                    |
| Glutathione peroxidase 3                   | GPX3        | 2878      | NM_002084.3                                     | -                    | -                  | -2.15 <sup>1</sup>   | -                    | -                 | -                    |
| NAD(P)H dehydrogenase [quinone] 1          | NQO1        | 1728      | NM_001025434.1<br>NM_001025433.1<br>NM_000903.2 | -                    | 4.66 <sup>1</sup>  | -                    | -                    | -                 | -                    |
| Catalase                                   | CAT         | 847       | NM_001752.2                                     | -                    | 13.15 <sup>1</sup> | 8.90 <sup>1</sup>    | -                    | -                 | -                    |

- no regulation
- 1 slightly significant regulation; P=0.05
- 2 significant regulation; P<0.05
- 3 highly significant regulation; P<0.01
